# Supplementary material for: Patterns and Temporal Dynamics of Natural Recombination in Noroviruses
Source: MDPI journal article supplement (doi:10.3390/v15020372), 2023-01-28
Supplement: s1 [file s1]

**Table S1.** Intergenogroup recombination events in NoVs detected by RDP4 in this study.

| Start of Recombinant Fragment | End of Recombinant Fragment | Length of Recombinant Fragment | Number of Recombination Events | Number of RDP4 Methods Supported the Event | Recombinant = Minor Parent + Major Parent (VP1 Genotype and P-Type) | Breakpoints within NoV Genome |
|-------------------------------|-----------------------------|--------------------------------|--------------------------------|--------------------------------------------|---------------------------------------------------------------------|-------------------------------|
| 5065                          | 7419                        | 2355                           | 4                              | 6                                          | GIV.NA1_GIV.PNA1=<br>GIV.2_GIV.P1+GNA2_GNA2.P1                      | ORF1/2 junction               |
| 3982                          | 4120                        | 139                            | 17                             | 5                                          | GIII.2_GIII.P2=<br>unknown+GI.7_GI.PNA2                             | ORF1                          |
| 4482                          | 4902                        | 421                            | 13                             | 4                                          | GVIII.1_GII.P28=<br>GI.2_GI.P2+GNA2_GNA2.P1                         | ORF1                          |
| 5964                          | 6778                        | 815                            | 2                              | 4                                          | GNA2_GNA2.P1=<br>unknown+GIV.2_GIV.P1                               | ORF1/2, ORF2/3 junction       |
| 5833                          | 6534                        | 702                            | 8                              | 5                                          | GVIII.1_GII.P28=<br>unknown+GII.5_GII.P5                            | ORF2                          |
| 3652                          | 3756                        | 105                            | 306                            | 4                                          | GII.4_GII.P31=<br>GI.3_GI.P13+GII.4_GII.P31                         | ORF1                          |
| 7290                          | 18                          | 142                            | 37                             | 4                                          | GIX.1_GII.P15=<br>unknown+GII.20_GII.P20                            | ORF3                          |
| 6008                          | 6652                        | 645                            | 161                            | 4                                          | GII.20_GII.P20=<br>GII.4_GII.P31+GIX.1_GII.P15                      | ORF2                          |
| 7208                          | 40                          | 224                            | 18                             | 4                                          | GVIII.1_GII.P28=<br>unknown+GII.2_GII.P2                            | ORF3                          |
| 4814                          | 5830                        | 1017                           | 6                              | 4                                          | GVIII.1_GII.P28=<br>unknown+GII.12_GII.P16                          | ORF1, ORF2                    |
